# Supplementary material
Source: MDPI journal article supplement (https://www.mdpi.com/2227-9717/10/9/1889)

## Supplementary Materials

### **Supplementary Matlab script for the calculation of parameters and validation of the model for the low concentration of Lead Pb**

S.1.1: Script for the calculation of non-linear parameters of the model

S.1.2: Script for the verification and validation of the model, comparison between the experimental  $J_v$  and the theoretical  $J_v$  for the low concentration of the solute, Lead

### **Supplementary Matlab script for the calculation of parameters and validation of the model for the medium concentration of Lead Pb**

S.2.1: Script for the calculation of non-linear parameters of the model

S.2.2: Script for the verification and validation of the model, comparison between the experimental  $J_v$  and the theoretical  $J_v$  for the medium concentration of the solute, Lead

### **Supplementary Matlab script for the calculation of parameters and validation of the model for the high concentration of Lead Pb**

S.3.1: Script for the calculation of non-linear parameters of the model

S.3.2: Script for the verification and validation of the model, comparison between the experimental  $J_v$  and the theoretical  $J_v$  for the high concentration of the solute, Lead

### **Supplementary Matlab script for the calculation of parameters and validation of the model for the low concentration of Arsenic As**

S.4.1: Script for the calculation of non-linear parameters of the model

S.4.2: Script for the verification and validation of the model, comparison between the experimental  $J_v$  and the theoretical  $J_v$  for the low concentration of the solute, Arsenic

### **Supplementary Matlab script for the calculation of parameters and validation of the model for the medium concentration of Arsenic As**

S.5.1: Script for the calculation of non-linear parameters of the model

S.5.2: Script for the verification and validation of the model, comparison between the experimental  $J_v$  and the theoretical  $J_v$  for the medium concentration of the solute, Arsenic

### **Supplementary Matlab script for the calculation of parameters and validation of the model for the high concentration of Arsenic As**

S.6.1: Script for the calculation of non-linear parameters of the model

S.6.2: Script for the verification and validation of the model, comparison between the experimental  $J_v$  and the theoretical  $J_v$  for the high concentration of the solute, Arsenic

### **Supplementary: Evolution of the $J_v$**

Figures S7 to S15, evolution of Pb and figures S16 to S24 for arsenic

## Supplementary: Matlab script for the calculation of parameters and validation of the model for the low concentration of Lead Pb

### S.1.1: Script for the calculation of non-linear parameters of the model

```
%PLOMO (Pb) - CONCENTRACION BAJA
%CALCULO DE LOS PARAMENTROS LP Y k DEL PLOMO PARA LA CONCENTRACION BAJA de
%la sal de metal+NaCl
clear all
clc
load PBBAJOFAT
dp = PBBAJOFAT(:,3);
R = PBBAJOFAT(:,4);
T = PBBAJOFAT(:,5);
Cf = PBBAJOFAT(:,6);
Cp = PBBAJOFAT(:,7);
Jv = PBBAJOFAT(:,8);
FaT = PBBAJOFAT(:,10);
S=0.99;
x1 = dp.*FaT;
x2 = S.*R.*T.*(Cf-Cp).*FaT;
x3 = Jv;
X = [x1, x2, x3];
Y = x3;
modelfun = @(b,x)(b(1)*x(:,1) - b(1)*x(:,2).*exp(x(:,3)/b(2)));
beta0 = [0.001;0.00001];%%
beta = nlinfit(X,Y,modelfun,beta0);
format long
disp(beta)
```

### S.1.2: Script for the verification and validation of the model, comparison between the experimental Jv and the theoretical Jv for the low concentration of the solute, Lead

```
%PLOMO (Pb) - CONCENTRACION BAJA
%CALCULO DEL JV (TEORICO) Y GRAFICAS COMPARATIVAS ENRE EL Jv(Teórico) y el
%Jv(experimental)PARA EL PLOMO EN LA CONCENTRACION BAJA de la sal de metal+NaCl
clear all
clc
load PBBAJOFAT
t = PBBAJOFAT(:,2);
dp = PBBAJOFAT(:,3);
R = PBBAJOFAT(:,4);
T = PBBAJOFAT(:,5);
Cf = PBBAJOFAT(:,6);
Cp = PBBAJOFAT(:,7);
Jv = PBBAJOFAT(:,8);
FaT = PBBAJOFAT(:,10);
% probando
Lp = 0.0000000000186511944;
S = 0.99;
k = 0.0000115205243721058;
x=t;
y = Lp*(dp.*FaT-S.*FaT.*R.*T.*(Cf-Cp).*exp(Jv/k));
plot(x,y,'r'), hold
plot(x,Jv, 'b')
legend('Jv Theoretical', 'Jv Experimental')
```

## Supplementary: Matlab script for the calculation of parameters and validation of the model for the medium concentration of Lead Pb

### S.2.1: Script for the calculation of non-linear parameters of the model

```
%PLOMO (Pb) - CONCENTRACION MEDIA
%CALCULO DE LOS PARAMENTROS LP Y k DEL PLOMO PARA LA CONCENTRACION MEDIA de
%la sal de metal+NaCl
clear all
clc
load PBMEDIOFAT
dp = PBMEDIOFAT(:,3);
R = PBMEDIOFAT(:,4);
T = PBMEDIOFAT(:,5);
Cf = PBMEDIOFAT(:,6);
Cp = PBMEDIOFAT(:,7);
Jv = PBMEDIOFAT(:,8);
FaT = PBMEDIOFAT(:,10);
S=0.9917;
x1 = dp.*FaT;
x2 = S.*R.*T.*(Cf-Cp).*FaT;
x3 = Jv;
X = [x1, x2, x3];
Y = x3;
modelfun = @(b,x)(b(1)*x(:,1) - b(1)*x(:,2).*exp(x(:,3)/b(2)));
beta0 = [0.019;0.000003];%%%%
beta = nlinfit(X,Y,modelfun,beta0);
format long
disp(beta)
```

### S.2.2: Script for the verification and validation of the model, comparison between the experimental Jv and the theoretical Jv for the medium concentration of the solute, Lead

```
%PLOMO (Pb) - CONCENTRACION MEDIO
%CALCULO DEL JV (TEORICO) Y GRAFICAS COMPARATIVAS ENRE EL Jv(Teórico) y el
%Jv(experimental)PARA EL PLOMO EN LA CONCENTRACION MEDIA de la sal de metal+NaCl
clear all
clc
load PBMEDIOFAT
t = PBMEDIOFAT(:,2);
dp = PBMEDIOFAT(:,3);
R = PBMEDIOFAT(:,4);
T = PBMEDIOFAT(:,5);
Cf = PBMEDIOFAT(:,6);
Cp = PBMEDIOFAT(:,7);
Jv = PBMEDIOFAT(:,8);
FaT = PBMEDIOFAT(:,10);
% probando
Lp = 0.00000000016976;
S = 0.9917;
k = 0.005155164841660;
x=t;
y = Lp*(dp.*FaT-S.*FaT.*R.*T.*(Cf-Cp).*exp(Jv/k));
plot(x,y,'r'), hold
plot(x,Jv, 'b')
legend('Jv Theoretical', 'Jv Experimental')
```

## Supplementary: Matlab script for the calculation of parameters and validation of the model for the high concentration of Lead Pb

### S.3.1: Script for the calculation of non-linear parameters of the model

```
%PLOMO (Pb) - CONCENTRACION ALTA
%CALCULO DE LOS PARAMENTROS LP Y k DEL PLOMO PARA LA CONCENTRACION ALTA de
%la sal de metal+NaCl
clear all
clc
load PBALTOFAT
dp = PBALTOFAT(:,3);
R = PBALTOFAT(:,4);
T = PBALTOFAT(:,5);
Cf = PBALTOFAT(:,6);
Cp = PBALTOFAT(:,7);
Jv = PBALTOFAT(:,8);
FaT = PBALTOFAT(:,10);
S=0.9921;
x1 = dp.*FaT;
x2 = S.*R.*T.*(Cf-Cp).*FaT;
x3 = Jv;
X = [x1, x2, x3];
Y = x3;
modelfun = @(b,x)(b(1)*x(:,1) - b(1)*x(:,2).*exp(x(:,3)/b(2)));
beta0 = [0.00001;0.0000101];%%%%
beta = nlinfit(X,Y,modelfun,beta0);
format long
disp(beta)
```

### S.3.2: Script for the verification and validation of the model, comparison between the experimental Jv and the theoretical Jv for the high concentration of the solute, Lead

```
%PLOMO (Pb) - CONCENTRACION ALTA
%CALCULO DEL JV (TEORICO) Y GRAFICAS COMPARATIVAS ENRE EL Jv(Teórico) y el
%Jv(experimental)PARA EL PLOMO EN LA CONCENTRACION ALTA de la sal de metal+NaCl
clear all
clc
load PBALTOFAT
t = PBALTOFAT(:,2);
dp = PBALTOFAT(:,3);
R = PBALTOFAT(:,4);
T = PBALTOFAT(:,5);
Cf = PBALTOFAT(:,6);
Cp = PBALTOFAT(:,7);
Jv = PBALTOFAT(:,8);
FaT = PBALTOFAT(:,10);
% probando
Lp = 0.000000000015528;
S = 0.9921;
k = 0.006944871296584;
y = Lp*(dp.*FaT-S.*FaT.*R.*T.*(Cf-Cp).*exp(Jv/k));
x=t;
plot(x,y,'r'), hold
plot(x,Jv, 'b')
legend('Jv Theoretical', 'Jv Experimental')
```

## Supplementary: Matlab script for the calculation of parameters and validation of the model for the low concentration of Arsenic As

### S.4.1: Script for the calculation of non-linear parameters of the model

```
%ARSENICO (As) - CONCENTRACION ALTA
%CALCULO DE LOS PARAMENTROS LP Y k DEL ARSENICO PARA LA CONCENTRACION ALTA
%del metal+NaCl
clear all
clc
load ASBAJOFAT
dp = ASBAJOFAT(:,3);
R = ASBAJOFAT(:,4);
T = ASBAJOFAT(:,5);
Cf = ASBAJOFAT(:,6);
Cp = ASBAJOFAT(:,7);
Jv = ASBAJOFAT(:,9);
FaT = ASBAJOFAT(:,12);
S=0.9935;
x1 = dp.*FaT;
x2 = S.*R.*T.*(Cf-Cp).*FaT;
x3 = Jv;
X = [x1, x2, x3];
Y = x3;
modelfun = @(b,x)(b(1)*x(:,1) - b(1)*x(:,2).*exp(x(:,3)/b(2)));
beta0 = [0.00001;0.000002];%%
beta = nlinfit(X,Y,modelfun,beta0);
format long
disp(beta)
```

### S.4.2: Script for the verification and validation of the model, comparison between the experimental Jv and the theoretical Jv for the low concentration of the solute, Arsenic

```
%ARSENICO (As) - CONCENTRACION BAJA
%CALCULO DEL JV (TEORICO) Y GRAFICAS COMPARATIVAS ENRE EL Jv(Teórico) y el
%Jv(experimental)PARA EL ARSENICO EN LA CONCENTRACION BAJA del metal+NaCl
clear all
clc
load ASBAJOFAT
t = ASBAJOFAT(:,2);
dp = ASBAJOFAT(:,3);
R = ASBAJOFAT(:,4);
T = ASBAJOFAT(:,5);
Cf = ASBAJOFAT(:,6);
Cp = ASBAJOFAT(:,7);
Jv = ASBAJOFAT(:,9);
FaT = ASBAJOFAT(:,12);
% probando
Lp = 0.00000000001721833853;
S = 0.9935;
k = 0.00000560428013930267;
x=t;
y = Lp*(dp.*FaT-S.*FaT.*R.*T.*(Cf-Cp).*exp(Jv/k));
plot(x,y,'r'), hold
plot(x,Jv, 'b')
legend('Jv Theoretical', 'Jv Experimental')
```

## Supplementary: Matlab script for the calculation of parameters and validation of the model for the medium concentration of Arsenic As

### S.5.1: Script for the calculation of non-linear parameters of the model

```
%ARSENICO (As) - CONCENTRACION MEDIA
%CALCULO DE LOS PARAMENTROS LP Y k DEL ARSENICO PARA LA CONCENTRACION MEDIA
%del metal+NaCl
clear all
clc
load ASMEDIOFAT
dp = ASMEDIOFAT(:,3);
R = ASMEDIOFAT(:,4);
T = ASMEDIOFAT(:,5);
Cf = ASMEDIOFAT(:,6);
Cp = ASMEDIOFAT(:,7);
Jv = ASMEDIOFAT(:,9);
FaT = ASMEDIOFAT(:,12);
S=0.989;
x1 = dp.*FaT;
x2 = S.*R.*T.*(Cf-Cp).*FaT;
x3 = Jv;
X = [x1, x2, x3];
Y = x3;
modelfun = @(b,x)(b(1)*x(:,1) - b(1)*x(:,2).*exp(x(:,3)/b(2)));
beta0 = [0.00005;0.0000089];%%%%
beta = nlinfit(X,Y,modelfun,beta0);
format long
disp(beta)
```

### S.5.2: Script for the verification and validation of the model, comparison between the experimental Jv and the theoretical Jv for the medium concentration of the solute, Arsenic

```
%ARSENICO (As) - CONCENTRACION MEDIA
%CALCULO DEL JV (TEORICO) Y GRAFICAS COMPARATIVAS ENRE EL Jv(Teórico) y el
%Jv(experimental)PARA EL ARSENICO EN LA CONCENTRACION MEDIA del metal+NaCl
clear all
clc
load ASMEDIOFAT
t = ASMEDIOFAT(:,2);
dp = ASMEDIOFAT(:,3);
R = ASMEDIOFAT(:,4);
T = ASMEDIOFAT(:,5);
Cf = ASMEDIOFAT(:,6);
Cp = ASMEDIOFAT(:,7);
Jv = ASMEDIOFAT(:,9);
FaT = ASMEDIOFAT(:,12);
% probando
Lp = 0.00000000002116029833;
S = 0.989;
k = 0.00000583688499826593;
x=t;
y = Lp*(dp.*FaT-S.*FaT.*R.*T.*(Cf-Cp).*exp(Jv/k));
plot(x,y,'r'), hold
plot(x,Jv, 'b')
legend('Jv Theoretical', 'Jv Experimental')
```

## Supplementary: Matlab script for the calculation of parameters and validation of the model for the high concentration of Arsenic As

### S.6.1: Script for the calculation of non-linear parameters of the model

```
%ARSENICO (As) - CONCENTRACION ALTA
%CALCULO DE LOS PARAMENTROS LP Y k DEL ARSENICO PARA LA CONCENTRACION ALTA
%del metal+NaCl
clear all
clc
load ASALTOFAT
dp = ASALTOFAT(:,3);
R = ASALTOFAT(:,4);
T = ASALTOFAT(:,5);
Cf = ASALTOFAT(:,6);
Cp = ASALTOFAT(:,7);
Jv = ASALTOFAT(:,9);
FaT = ASALTOFAT(:,12);
S=0.9912;
x1 = dp.*FaT;
x2 = S.*R.*T.*(Cf-Cp).*FaT;
x3 = Jv;
X = [x1, x2, x3];
Y = x3;
modelfun = @(b,x)(b(1)*x(:,1) - b(1)*x(:,2).*exp(x(:,3)/b(2)));
beta0 = [0.01;0.00001];%%%%
beta = nlinfit(X,Y,modelfun,beta0);
format long
disp(beta)
```

### S.6.2: Script for the verification and validation of the model, comparison between the experimental Jv and the theoretical Jv for the high concentration of the solute, Arsenic

```
%ARSENICO (As) - CONCENTRACION ALTA
%CALCULO DEL JV (TEORICO) Y GRAFICAS COMPARATIVAS ENRE EL Jv(Teórico) y el
%Jv(experimental)PARA EL ARSENICO EN LA CONCENTRACION ALTA del metal+NaCl
clear all
clc
load ASALTOFAT
t = ASALTOFAT(:,2);
dp = ASALTOFAT(:,3);
R = ASALTOFAT(:,4);
T = ASALTOFAT(:,5);
Cf = ASALTOFAT(:,6);
Cp = ASALTOFAT(:,7);
Jv = ASALTOFAT(:,9);
FaT = ASALTOFAT(:,12);
% probando
Lp = 0.00000000001904335884;
S = 0.9912;
k = 0.00000749092766652238;
x=t;
y = Lp*(dp.*FaT-S.*FaT.*R.*T.*(Cf-Cp).*exp(Jv/k));
plot(x,y,'r'), hold
plot(x,Jv, 'b')
legend('Jv Theoretical', 'Jv Experimental')
```

**Supplementary:** Evolution of the Jv

**Figure S7:** Evolution of Jv for Pb with 5 Bar pressure and low concentration

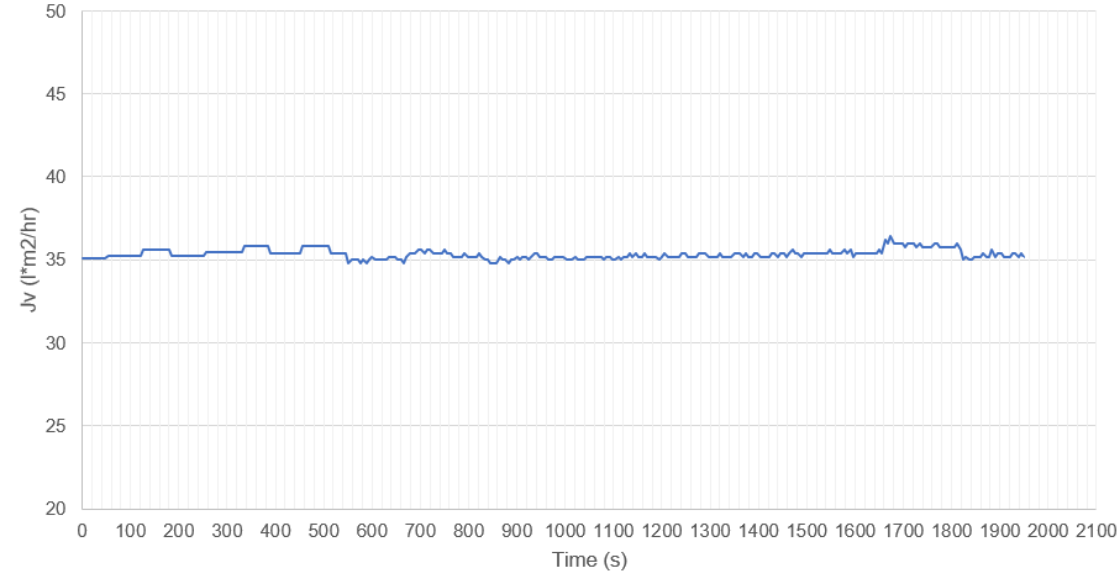

**Figure S8:** Evolution of Jv for Pb with 7.5 Bar pressure and low concentration

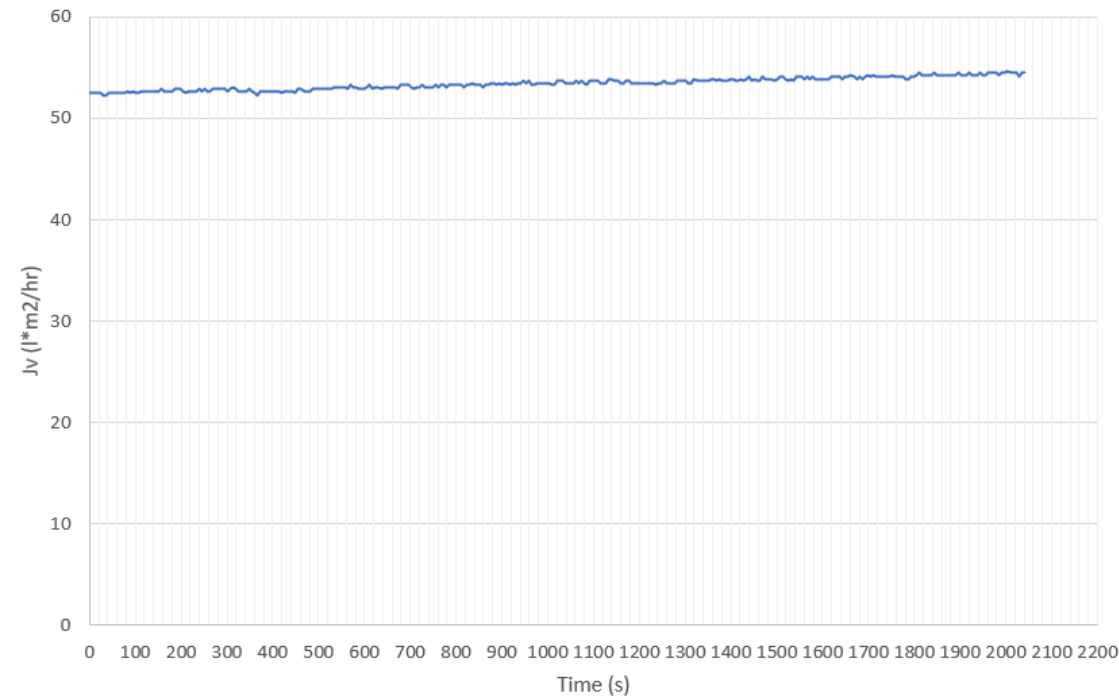



**Figure S9:** Evolution of Jv for Pb with 10.0 Bar pressure and low concentration

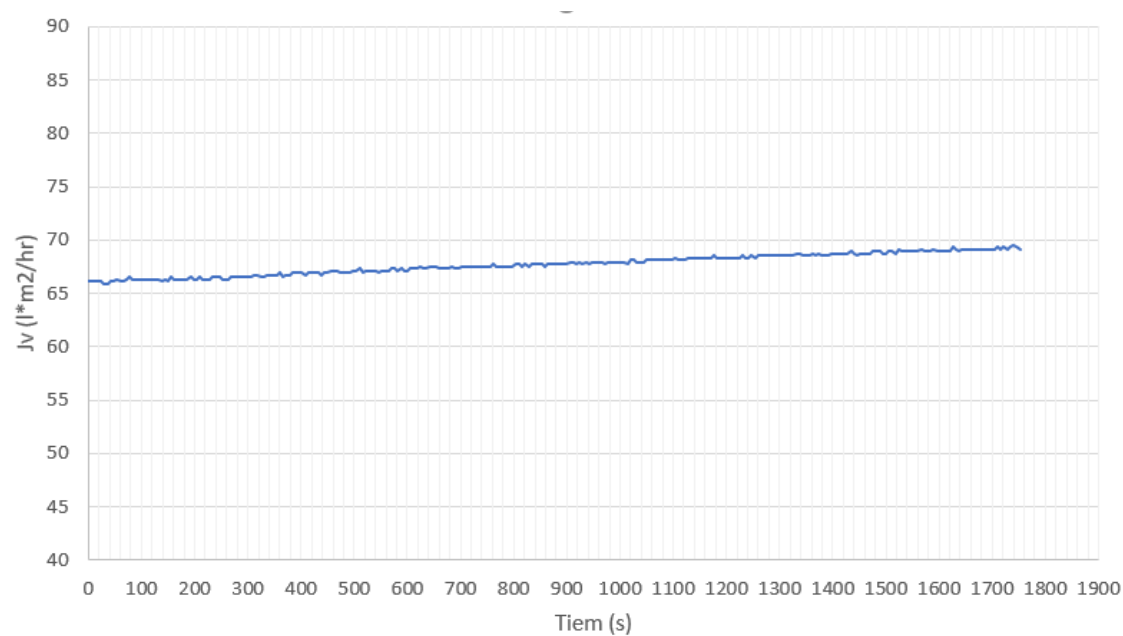

**Figure S10:** Evolution of Jv for Pb with 5.0 Bar pressure and medium concentration

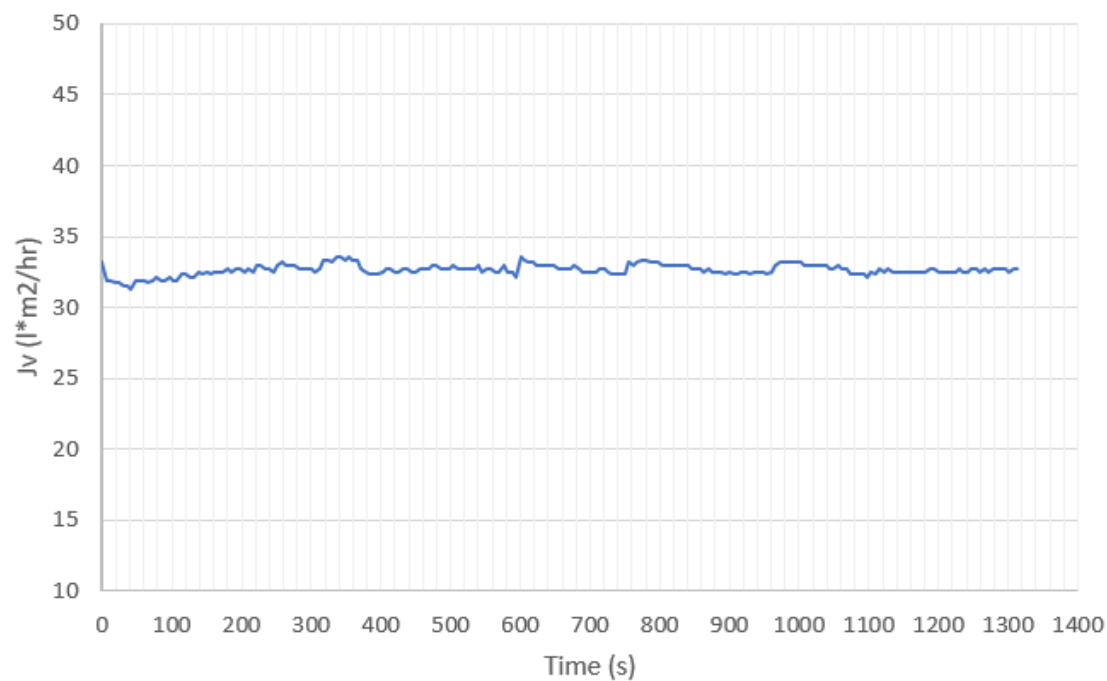

**Figure S11:** Evolution of Jv for Pb with 7.5 Bar pressure and medium concentration

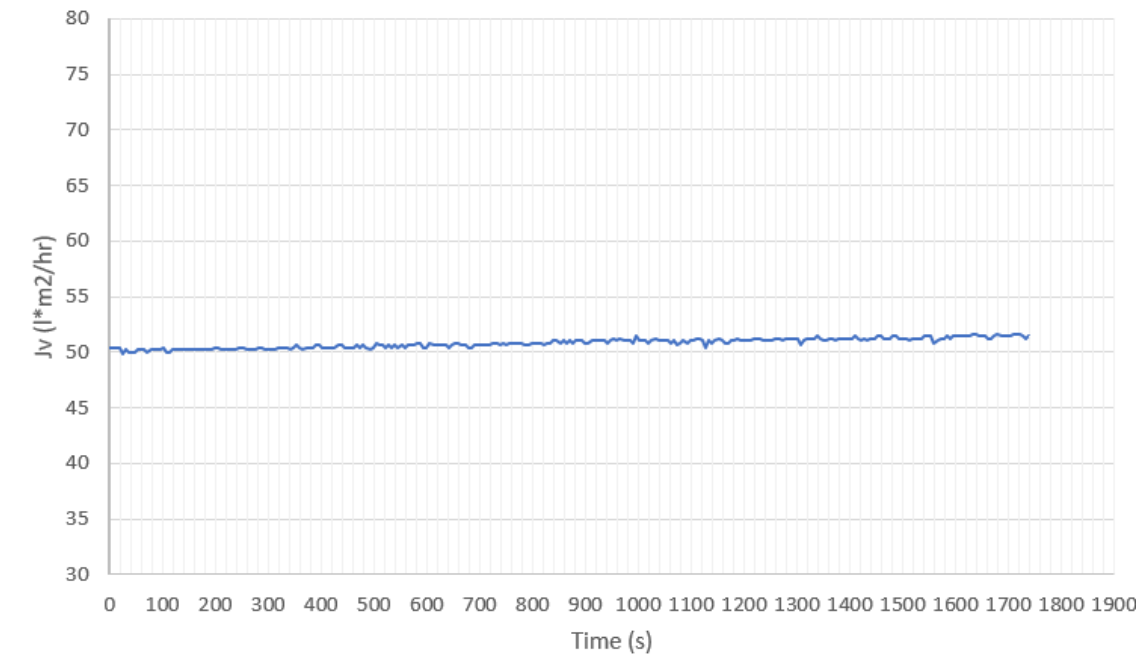

**Figure S12:** Evolution of Jv for Pb with 10.0 Bar pressure and medium concentration

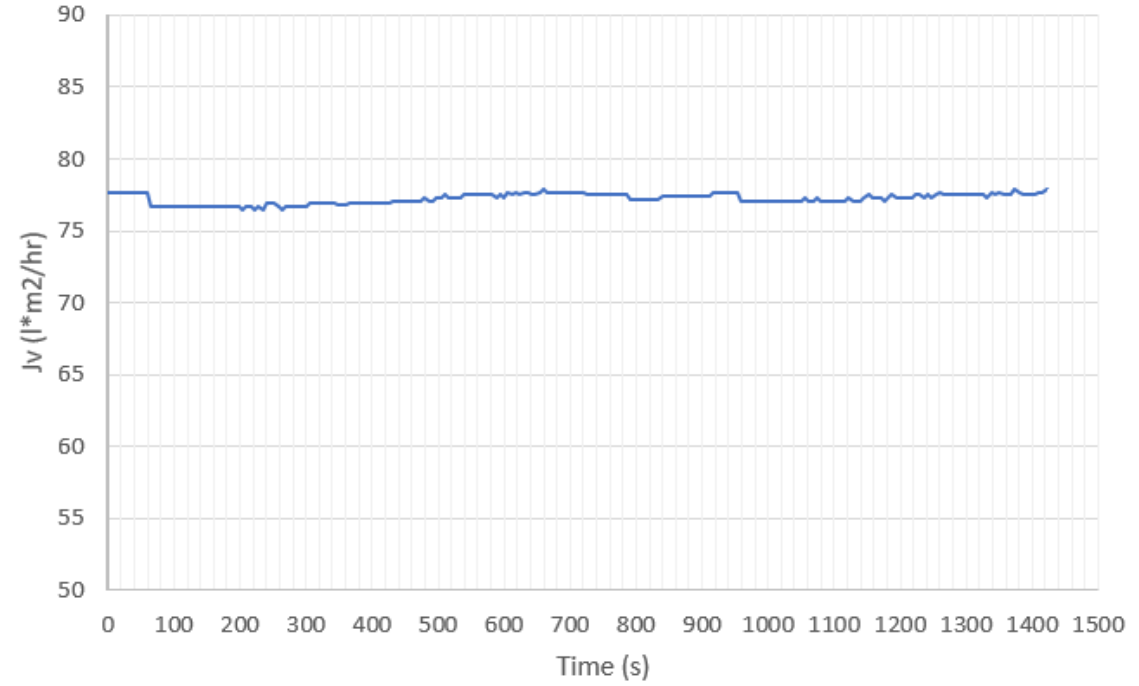

**Figure S13:** Evolution of  $J_v$  for Pb with 5.0 Bar pressure and high concentration

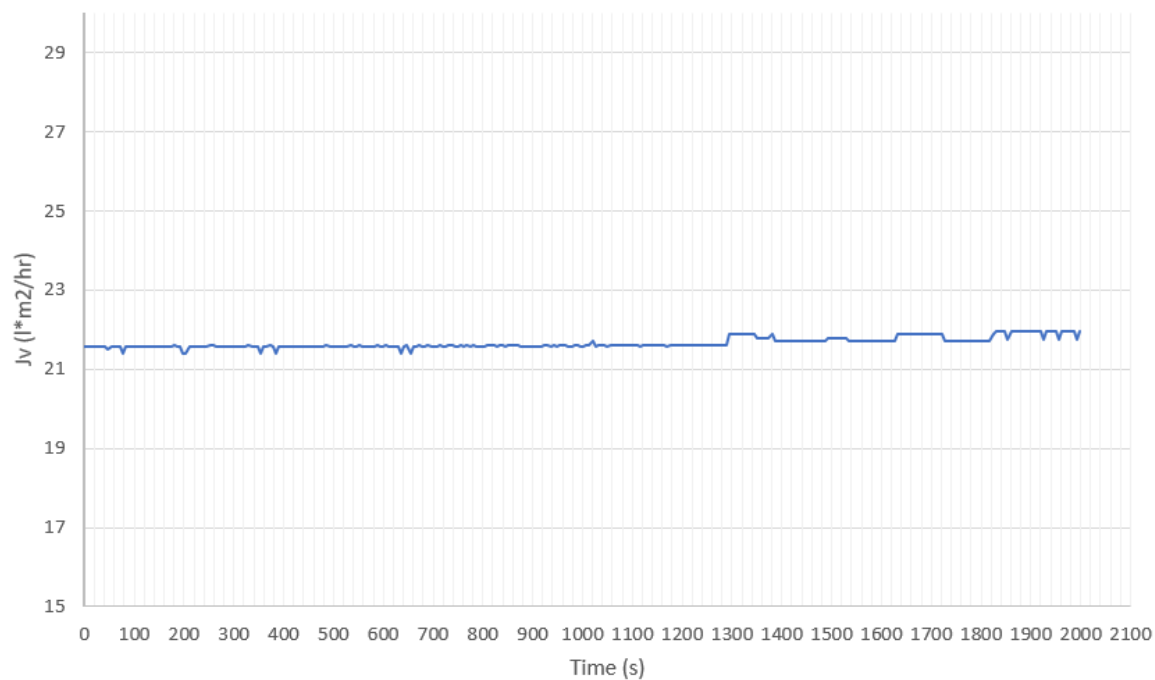

**Figure S14:** Evolution of  $J_v$  for Pb with 7.5 Bar pressure and high concentration

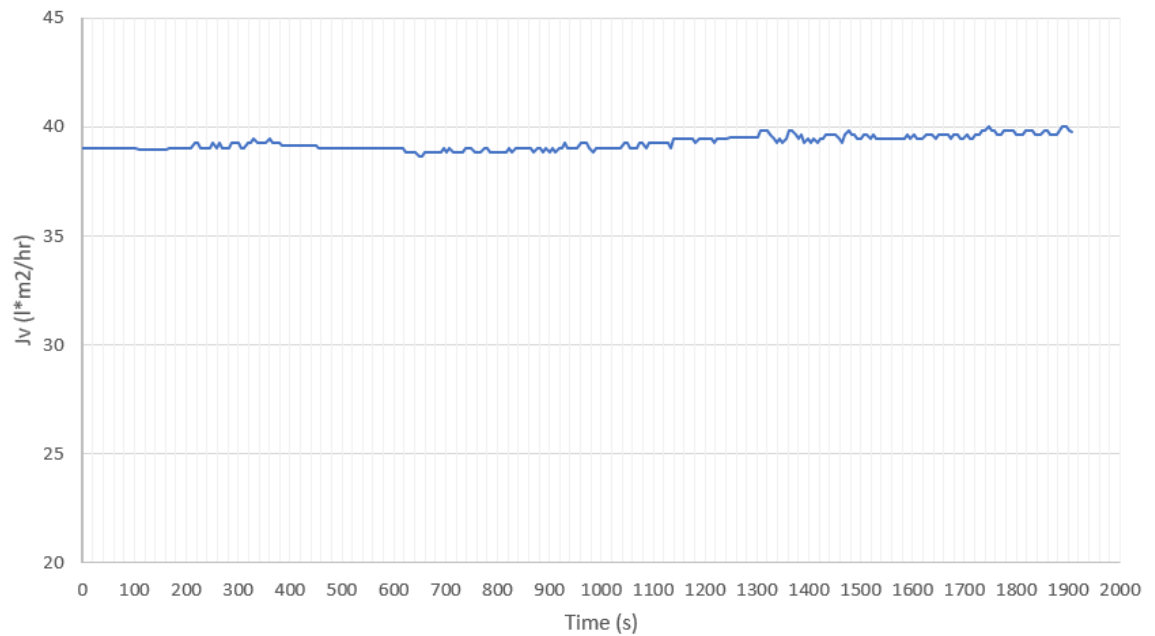

**Figure S15:** Evolution of  $J_v$  for Pb with 10.0 Bar pressure and high concentration

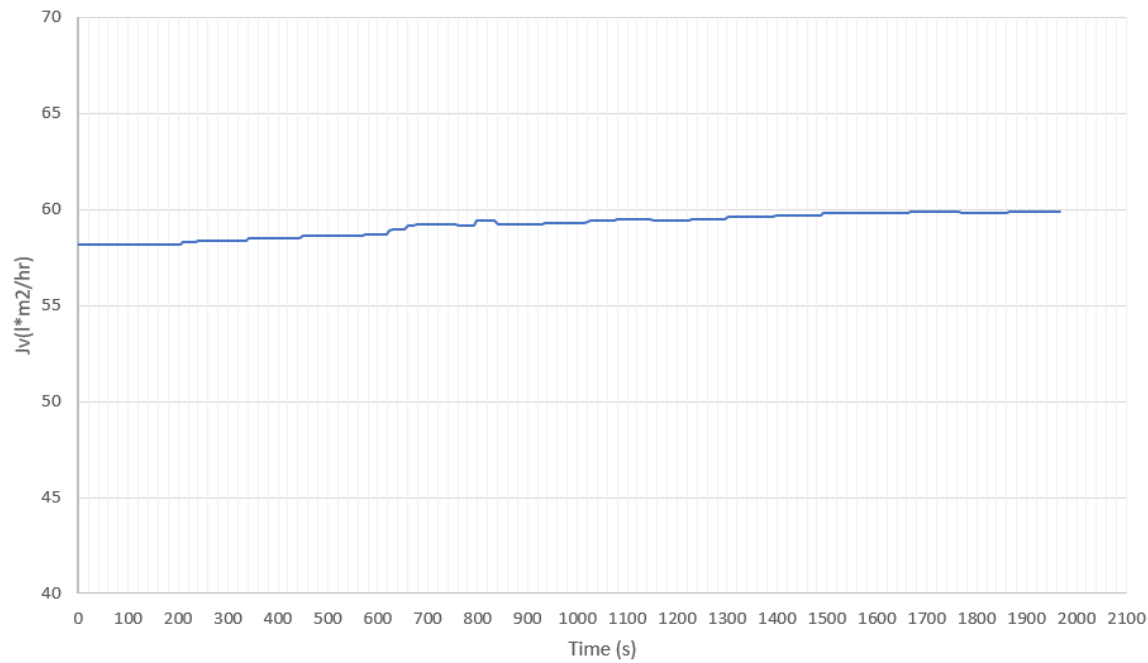

**Figure S16:** Evolution of  $J_v$  for As with 5 Bar pressure and low concentration

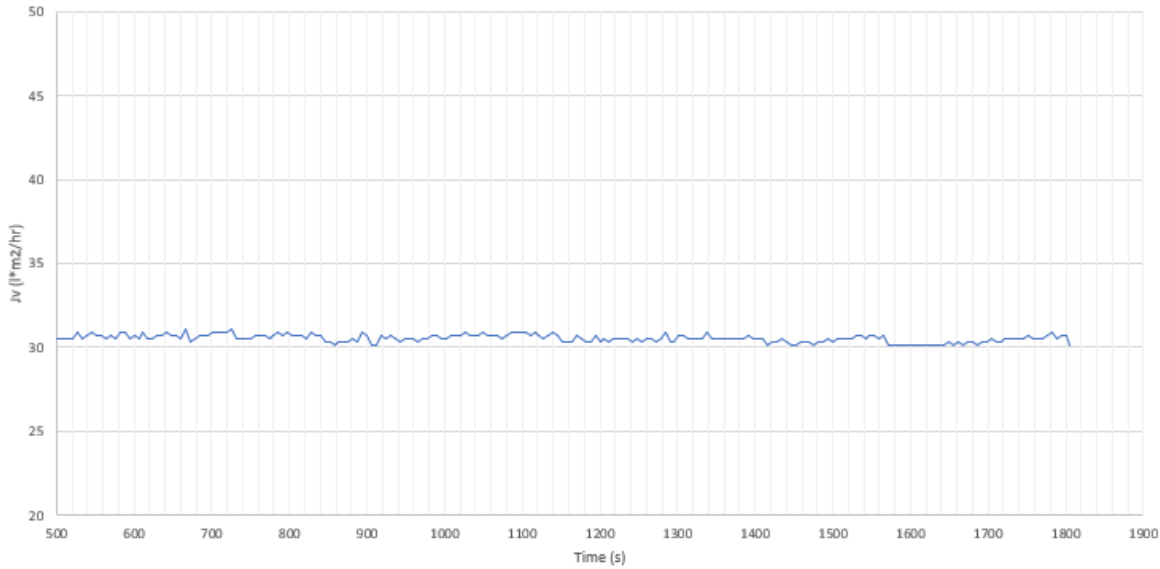

**Figure S17:** Evolution of  $J_v$  for As with 7.5 Bar pressure and low concentration

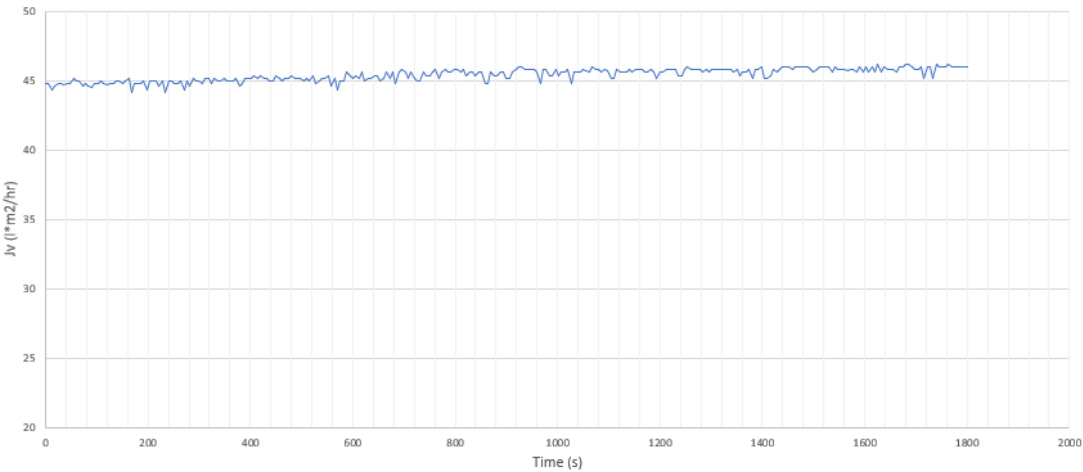

**Figure S18:** Evolution of  $J_v$  for As with 10.0 Bar pressure and low concentration

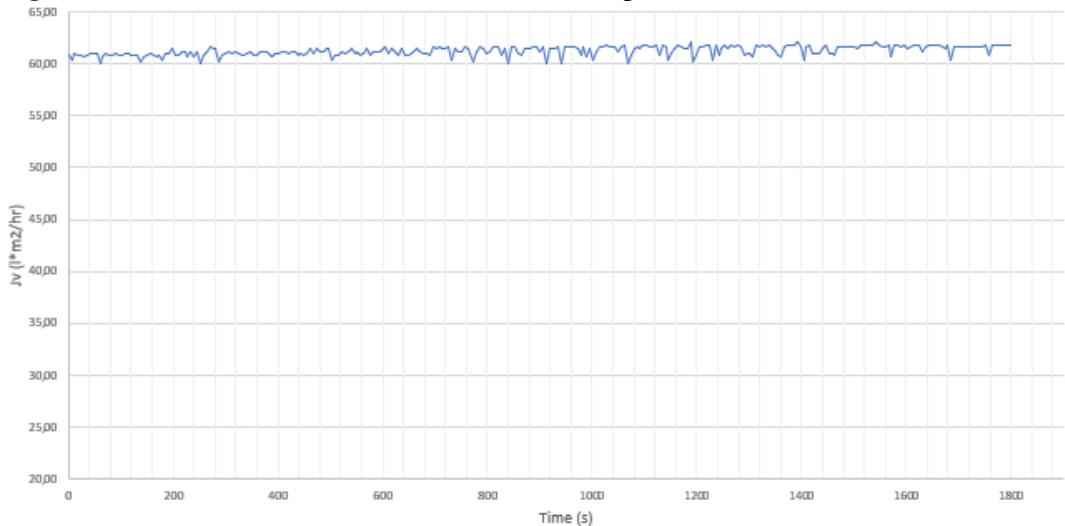

**Figure S19:** Evolution of  $J_v$  for As with 5 Bar pressure and medium concentration

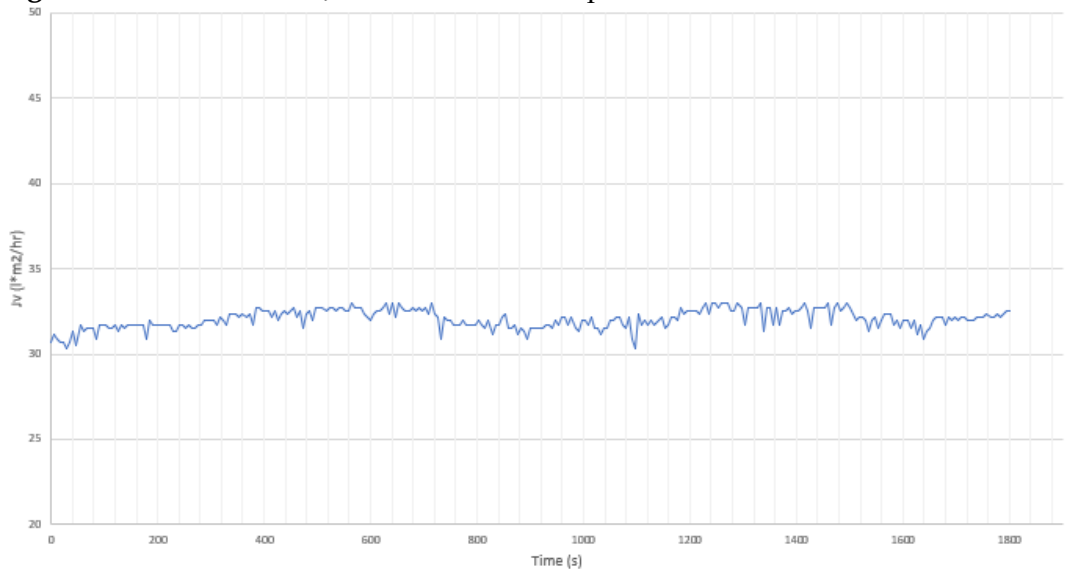

**Figure S20:** Evolution of  $J_v$  for As with 7.5 Bar pressure and medium concentration

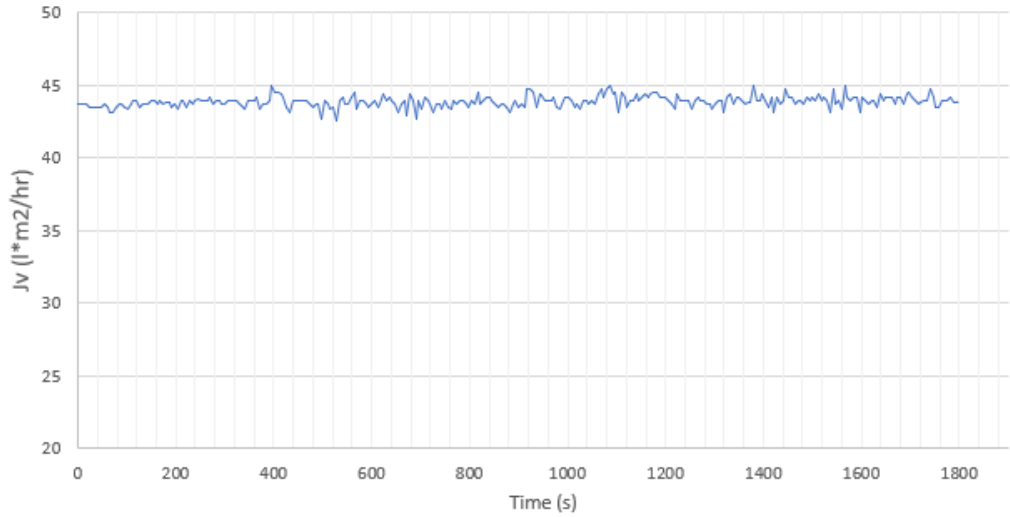

**Figure S21:** Evolution of  $J_v$  for As with 10.0 Bar pressure and medium concentration

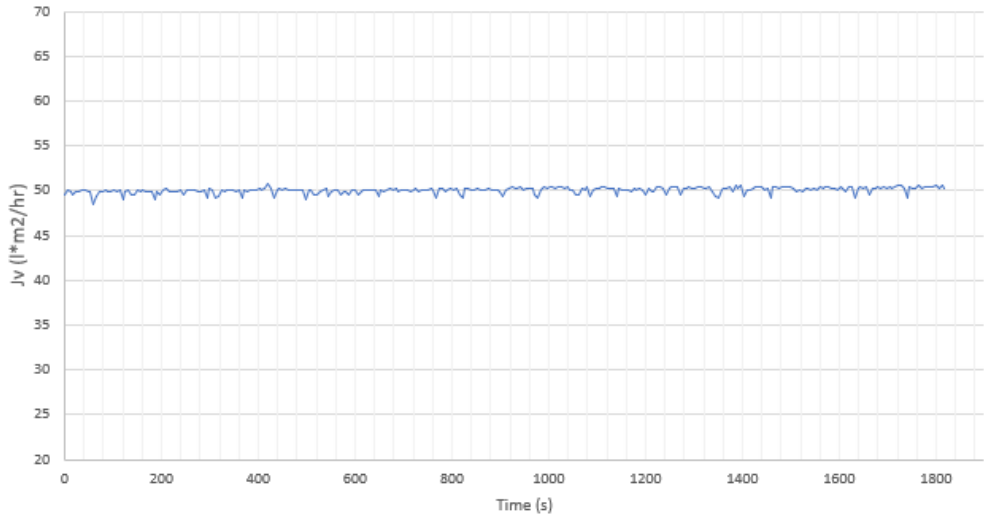

**Figure S22:** Evolution of  $J_v$  for As with 5.0 Bar pressure and high concentration

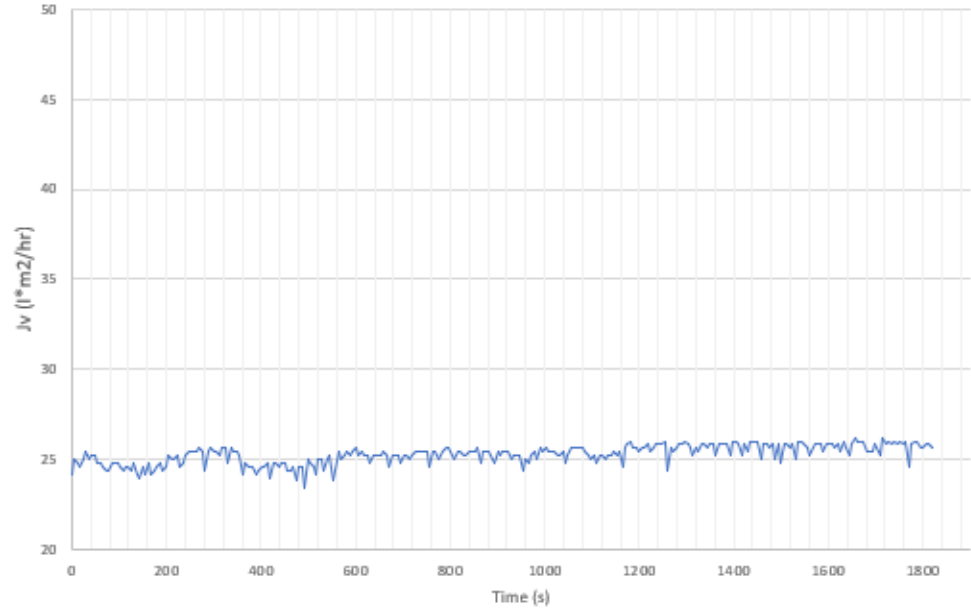

**Figure S23:** Evolution of Jv for As with 7.5 Bar pressure and high concentration

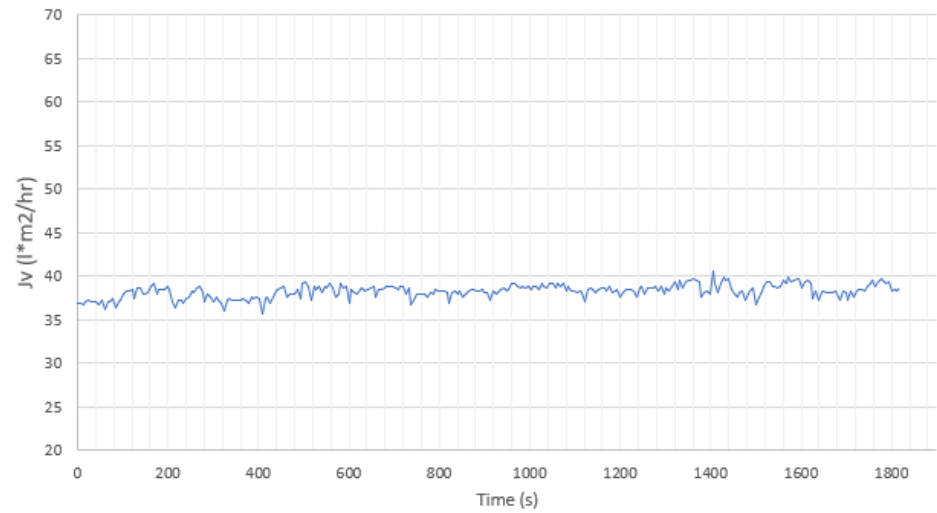

**Figure S24:** Evolution of Jv for As with 10.0 Bar pressure and high concentration

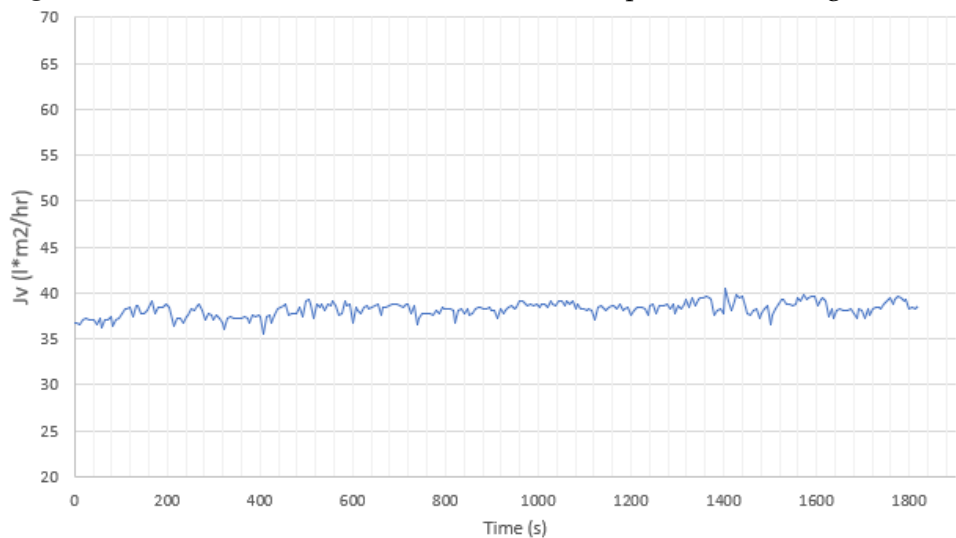

Supplement: s1 [file s1]
